# Supplementary material for: Comparative Genomics Analyses of Lifestyle Transitions at the Origin of an Invasive Fungal Pathogen in the Genus Cryphonectria
Source: PubMed Central journal article supplement (PMC7565894; doi:10.1128/msphere.00737-20), 2020-10-14

# OG0009468

*C. parasitica*  
VS

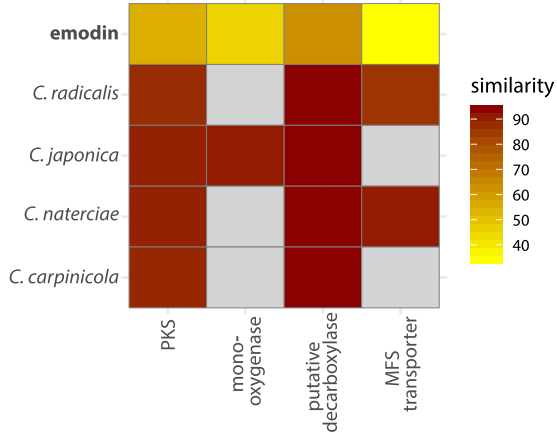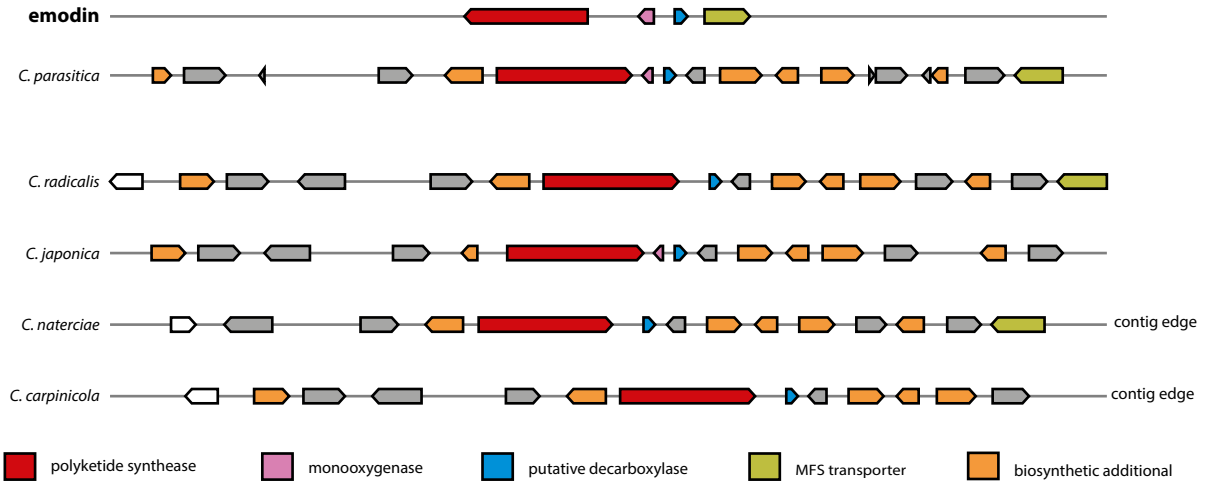

# OG0002648

*C. parasitica*  
VS

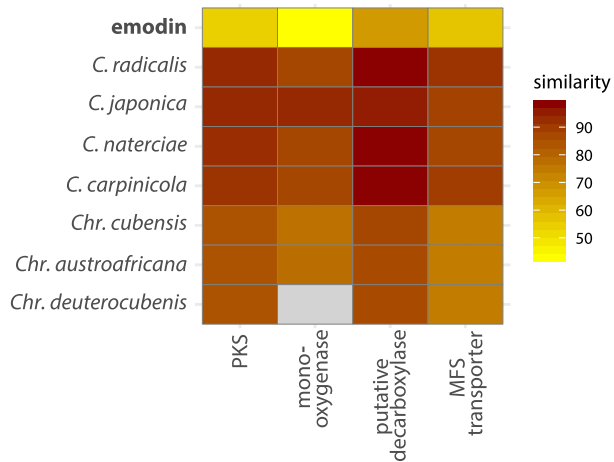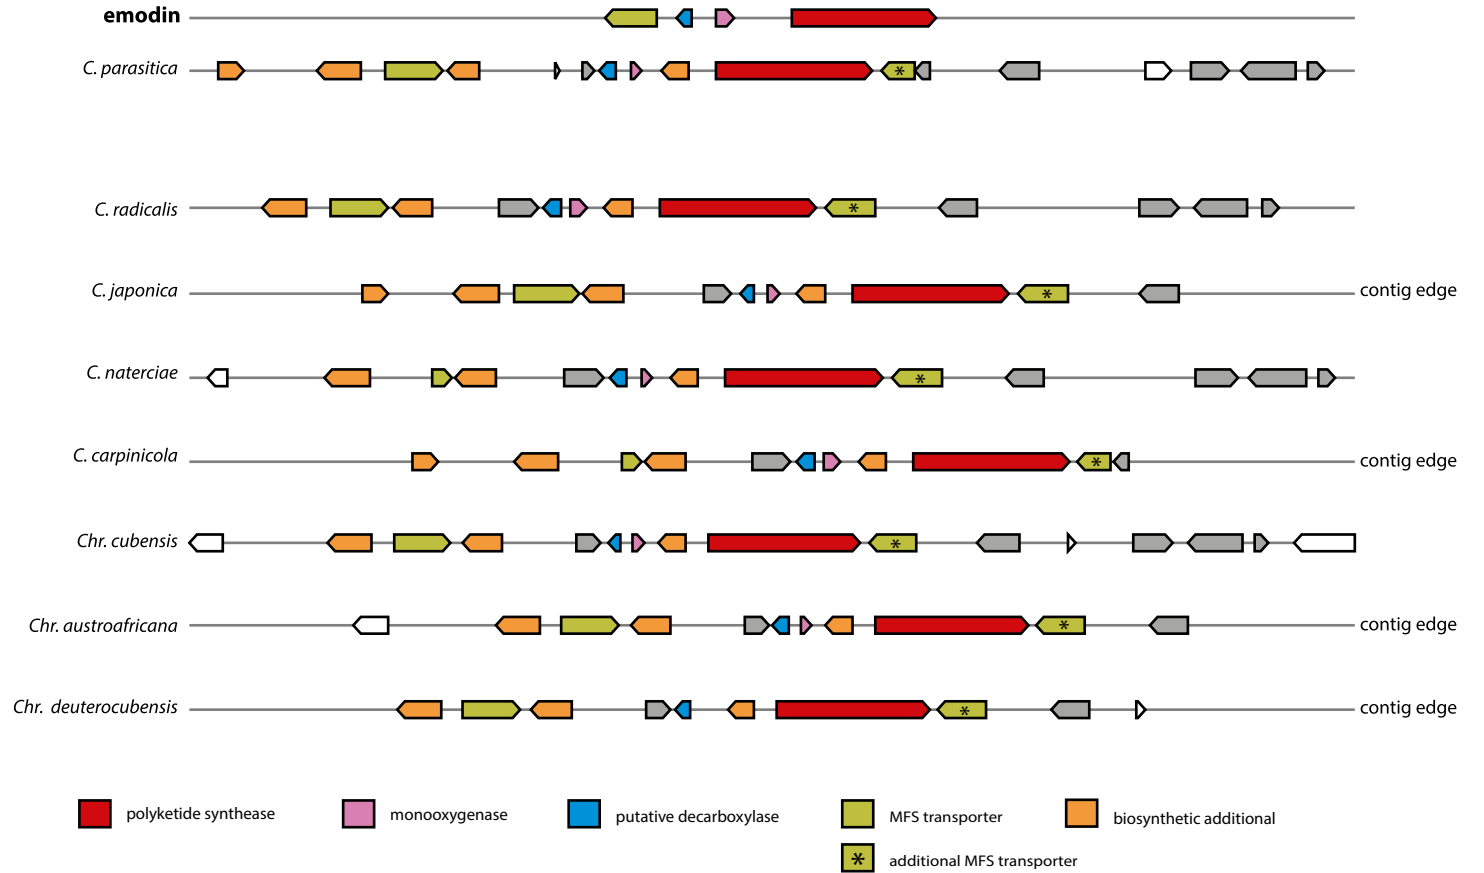

Supplement: mSphere.00737-20-sf003.pdf [file mSphere.00737-20-sf003.pdf]
